# Supplementary material for: A tilapia skin-derived gelatin hydrogel combined with the adipose-derived stromal vascular fraction for full-thickness wound healing
Source: Royal Society of Chemistry journal article supplement (doi:10.1039/d4na00332b), 2024-01-01
Supplement: d4na00332b2.pdf [file d4na00332b2.pdf]

## Supporting Information

### **Tilapia skin-derived gelatin hydrogel combined with adipose-derived stromal vascular fraction for full-thickness wound healing**

Yanan Luo<sup>a,b,1</sup>, Manfei Fu<sup>a,1</sup>, Ziyi Zhou<sup>c</sup>, Xiaopei Zhang<sup>a,d</sup>, Qingxia Guo<sup>a,e</sup>, Yawen Wang<sup>a,d</sup>,  
Weina Zhang<sup>b</sup>, Yuanfei Wang<sup>f\*</sup>, Zhenyu Chen<sup>b\*</sup>, Tong Wu<sup>a,d,\*</sup>

<sup>a</sup>Medical Research Center, The Affiliated Hospital of Qingdao University, Qingdao 266000, China

<sup>b</sup>Department of Cosmetic and Plastic Surgery, The Affiliated Hospital of Qingdao University, Qingdao 266000, China

<sup>c</sup>Department of Plastic, Reconstructive and Cosmetic Surgery, Xinqiao Hospital, Army Medical University, Chongqing 400037, China

<sup>d</sup>Shandong Key Laboratory of Medical and Health Textile Materials, Collaborative Innovation Center for Eco-textiles of Shandong Province and the Ministry of Education, College of Textile & Clothing, Qingdao University, Qingdao 266071, China

<sup>e</sup>Institute of Neuroregeneration & Neurorehabilitation, Department of Pathophysiology, School of Basic Medicine, Qingdao University, Qingdao 266071, China

<sup>f</sup>Qingdao Stomatological Hospital Affiliated to Qingdao University, Qingdao 266001, China

<sup>1</sup>Y. Luo and M. Fu contributed equally to this study.

\*Address correspondence to zhizunbao19@163.com (Y. Wang), czy.plastic@126.com (Z. Chen), twu@qdu.edu.cn (T. Wu)

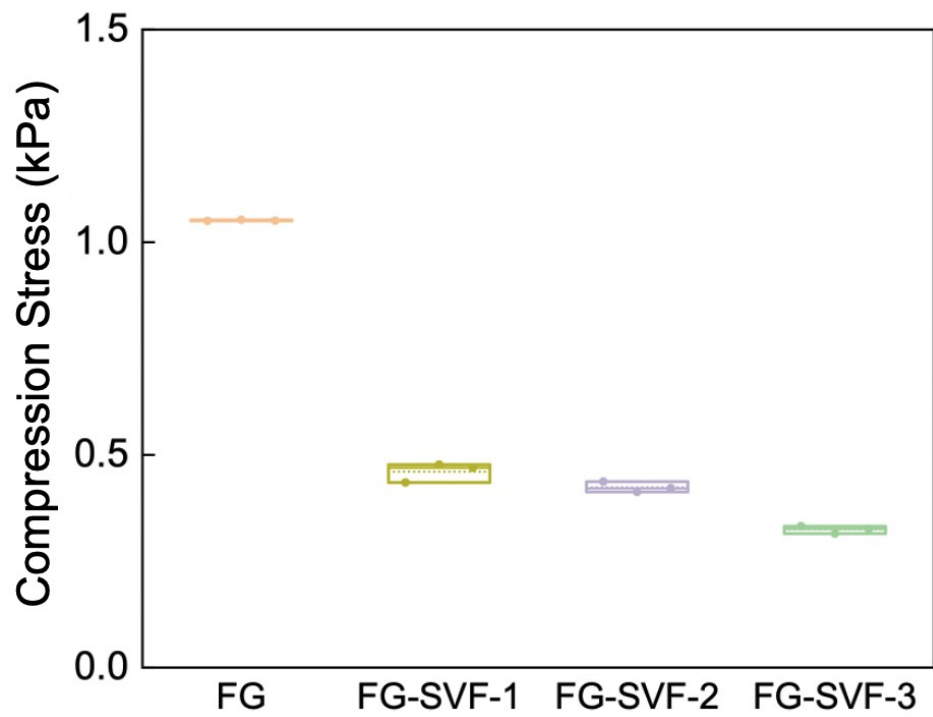

Figure S1. Compression mechanical determination of the different hydrogels.

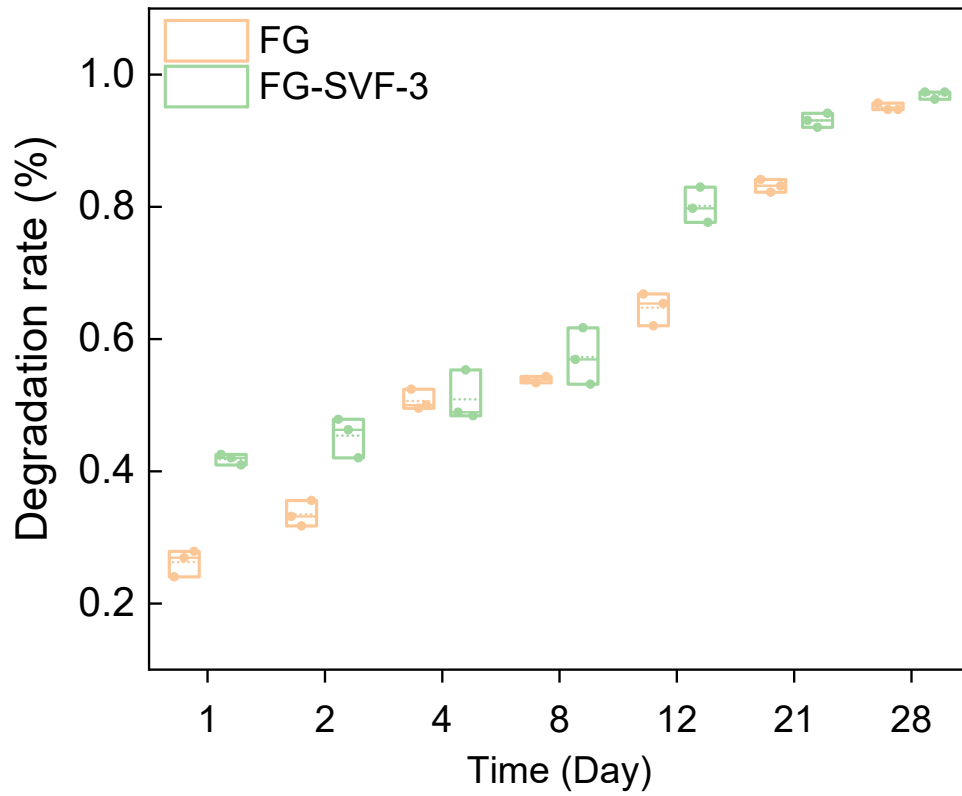

Figure S2. The degradation rates of FG and FG-SVF-3 hydrogels for 28 days.

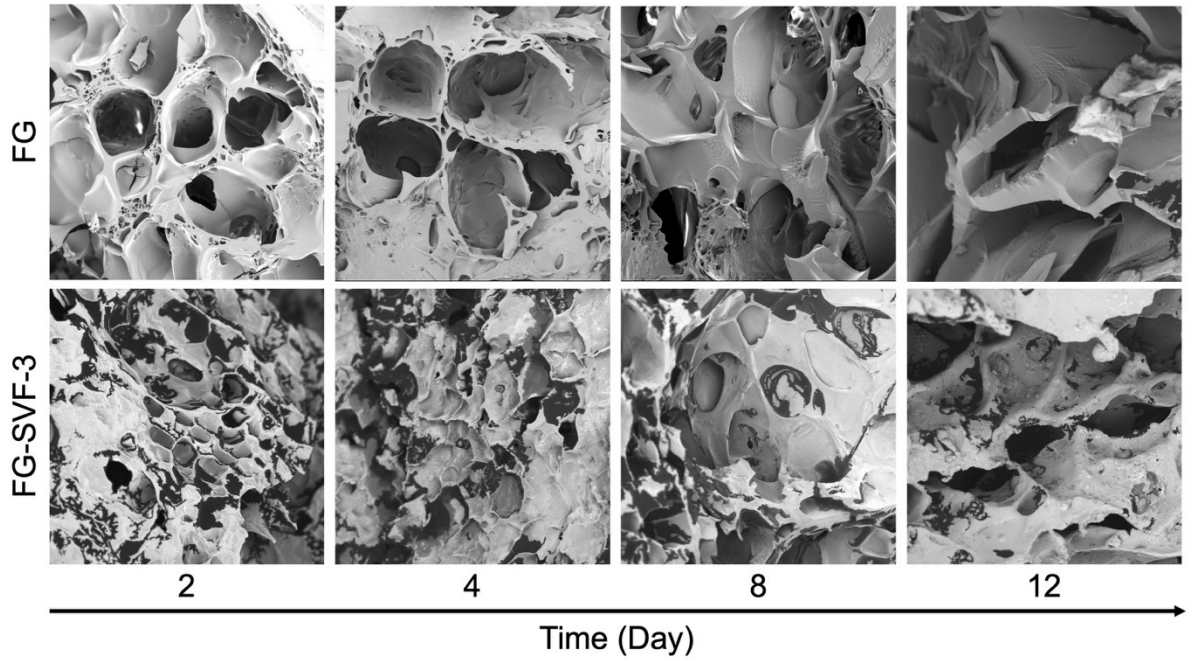

Figure S3. SEM images of FG and FG-SVF-3 hydrogels after degradation for 2, 4, 8, and 12 days.

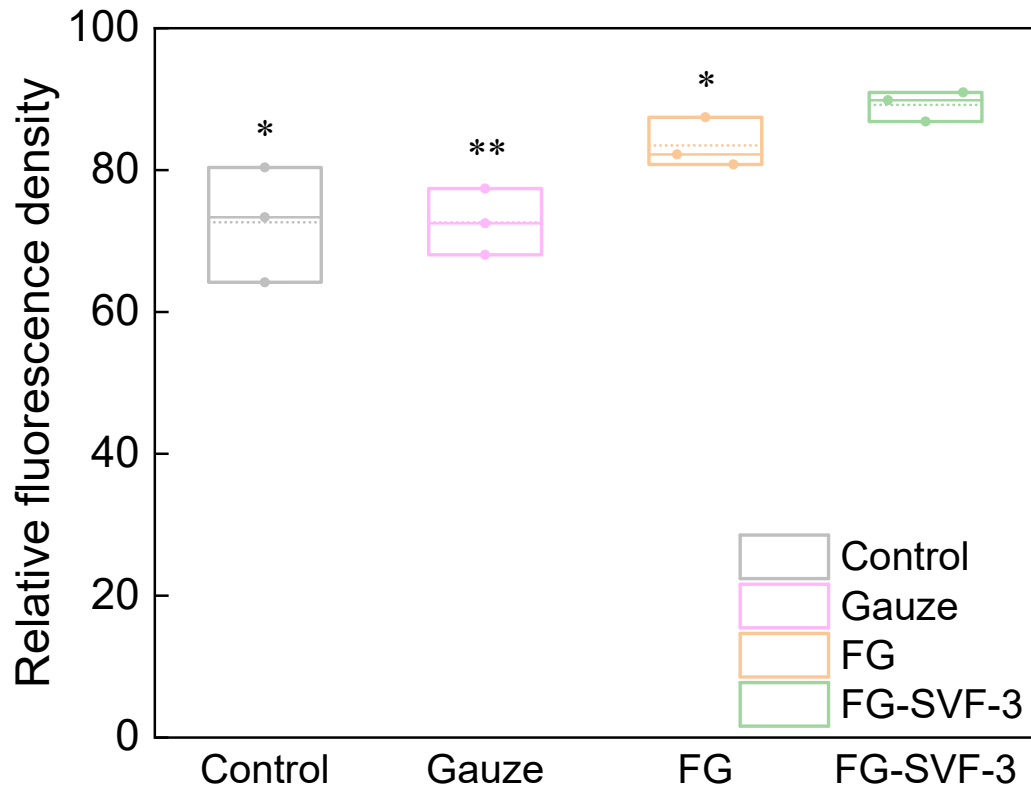

Figure S4. Masson's trichrome staining of the wounds was treated with control, gauze, FG, and FG-SVF-3 groups on day 15. \* $P < 0.05$  and \*\* $P < 0.01$  indicate the significant differences when compared with FG-SVF-3.
