# Supplementary figures and images for: A tilapia skin-derived gelatin hydrogel combined with the adipose-derived stromal vascular fraction for full-thickness wound healing
Source: Royal Society of Chemistry journal article supplement (doi:10.1039/d4na00332b), 2024-01-01

Compression Stress (kPa)

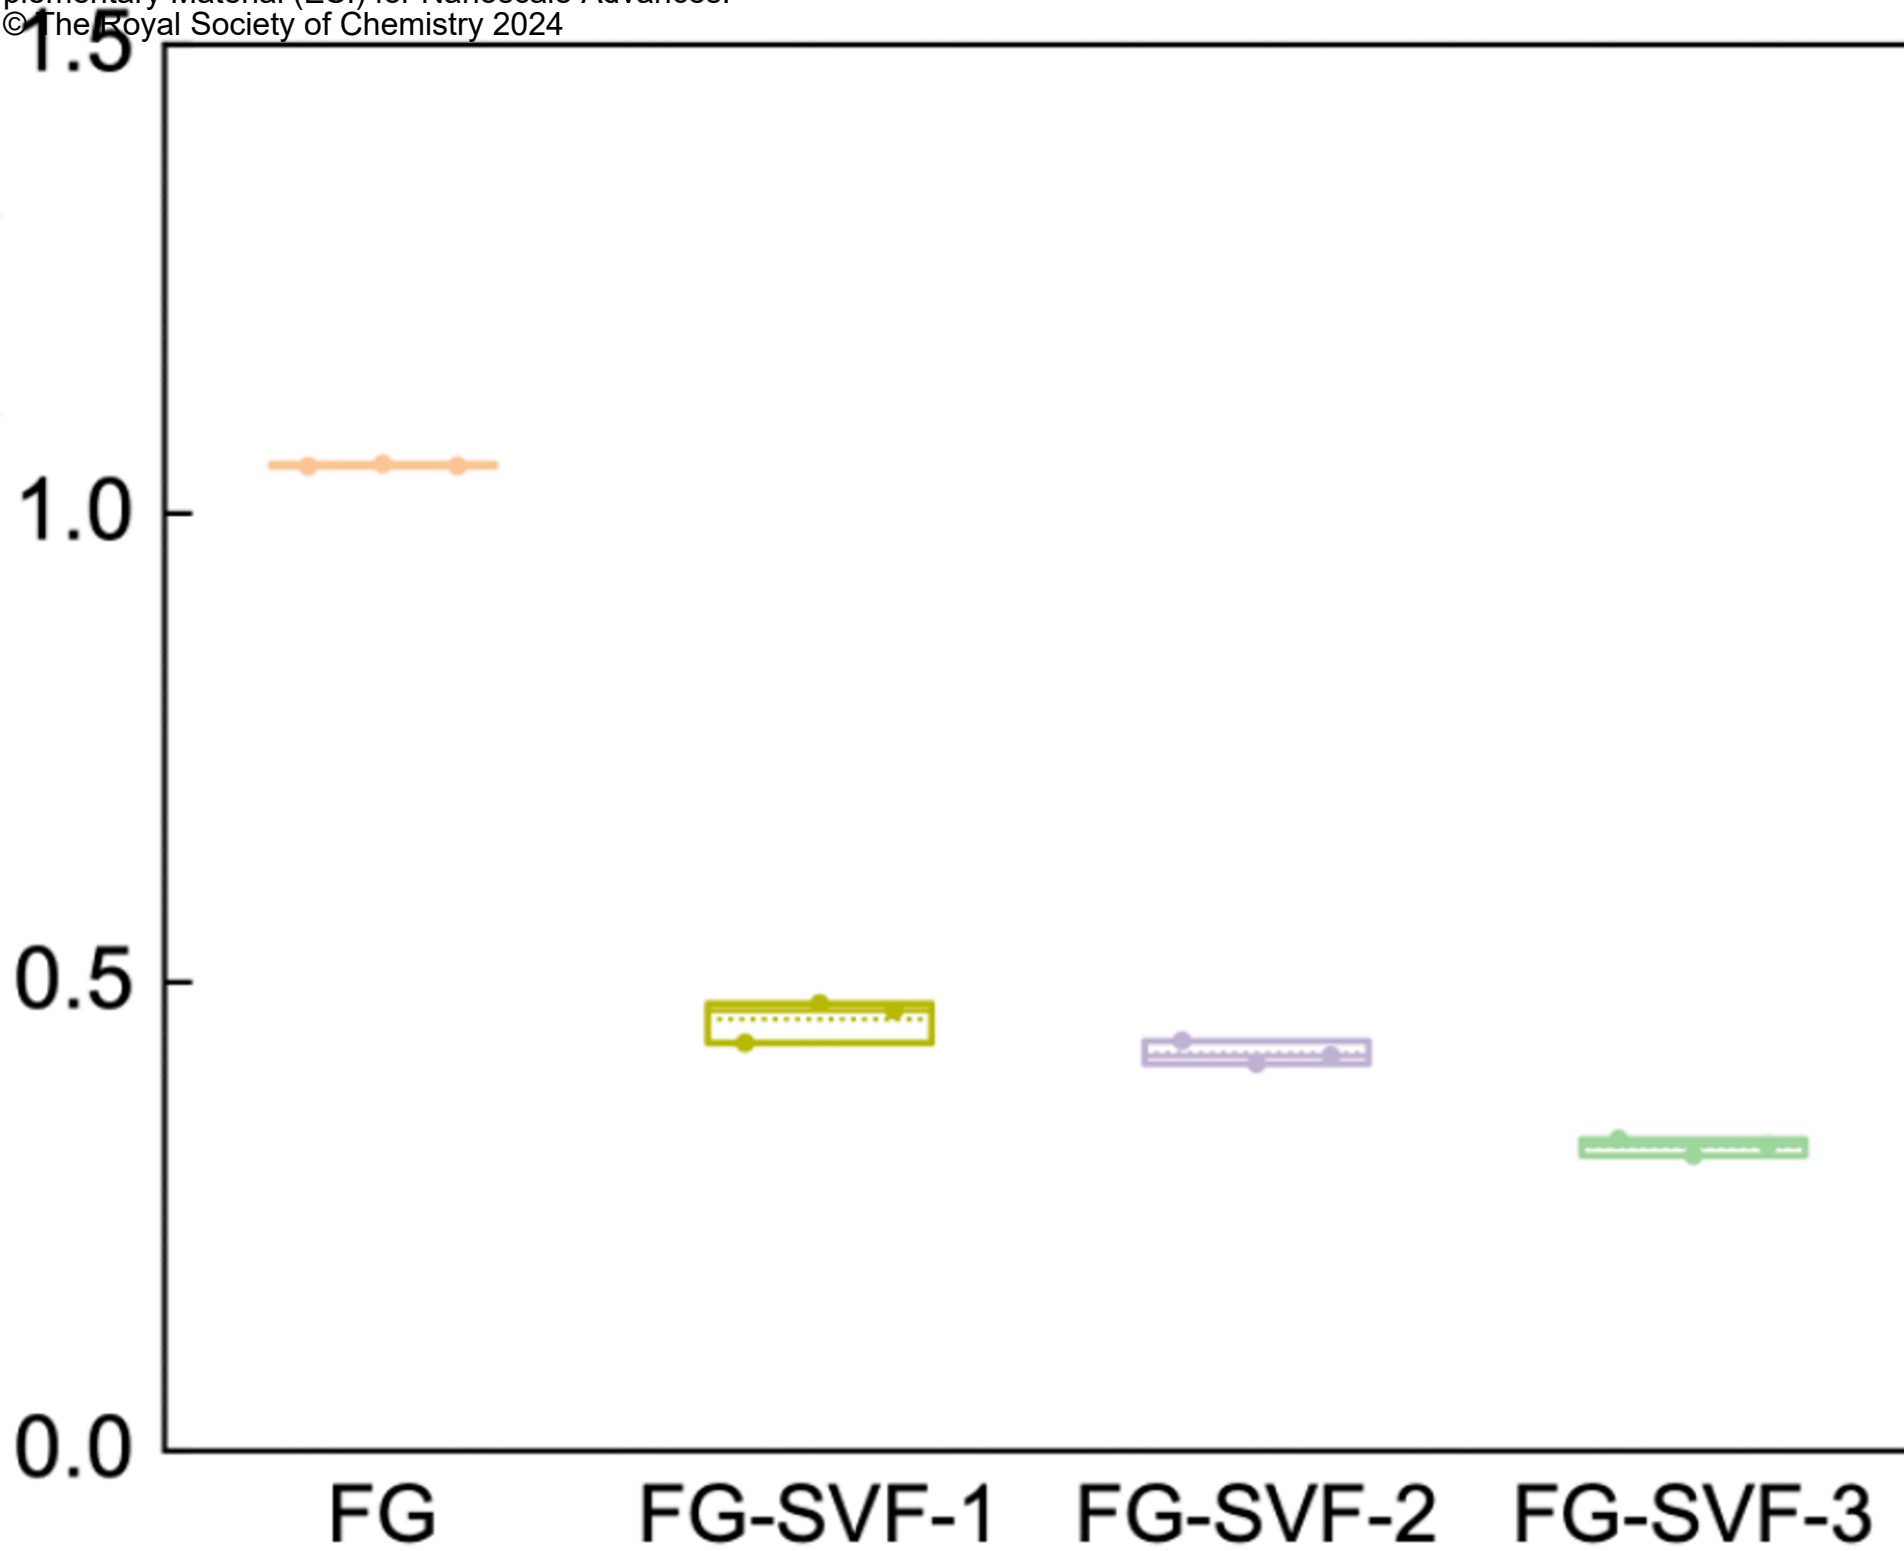

Supplement: d4na00332b3.pdf [file d4na00332b3.pdf]

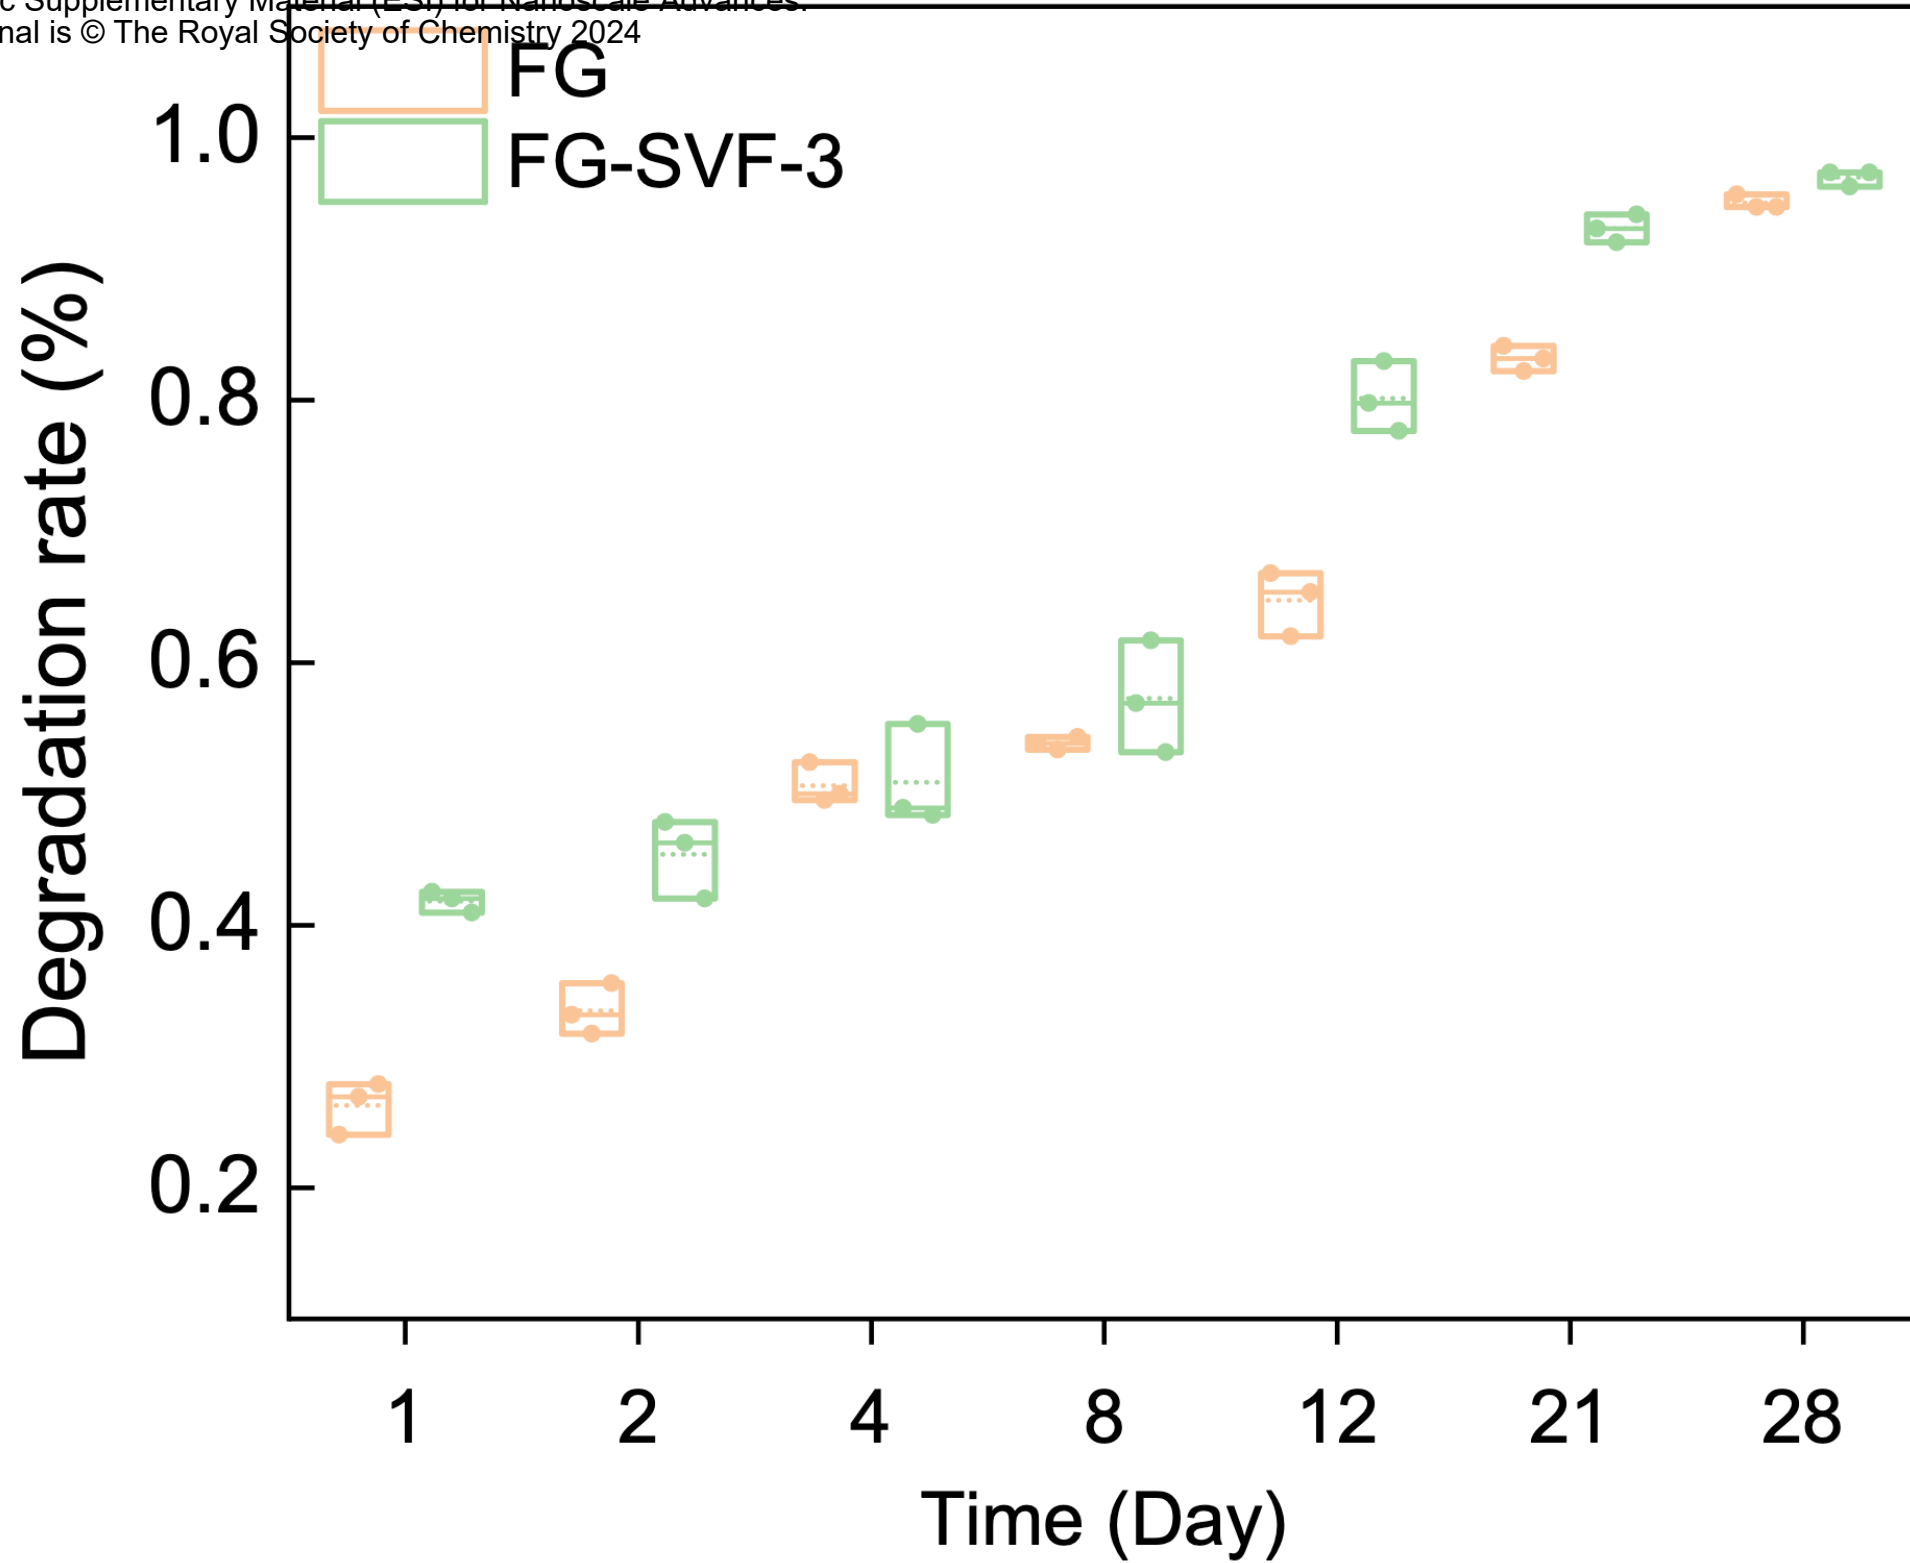

Supplement: d4na00332b4.pdf [file d4na00332b4.pdf]

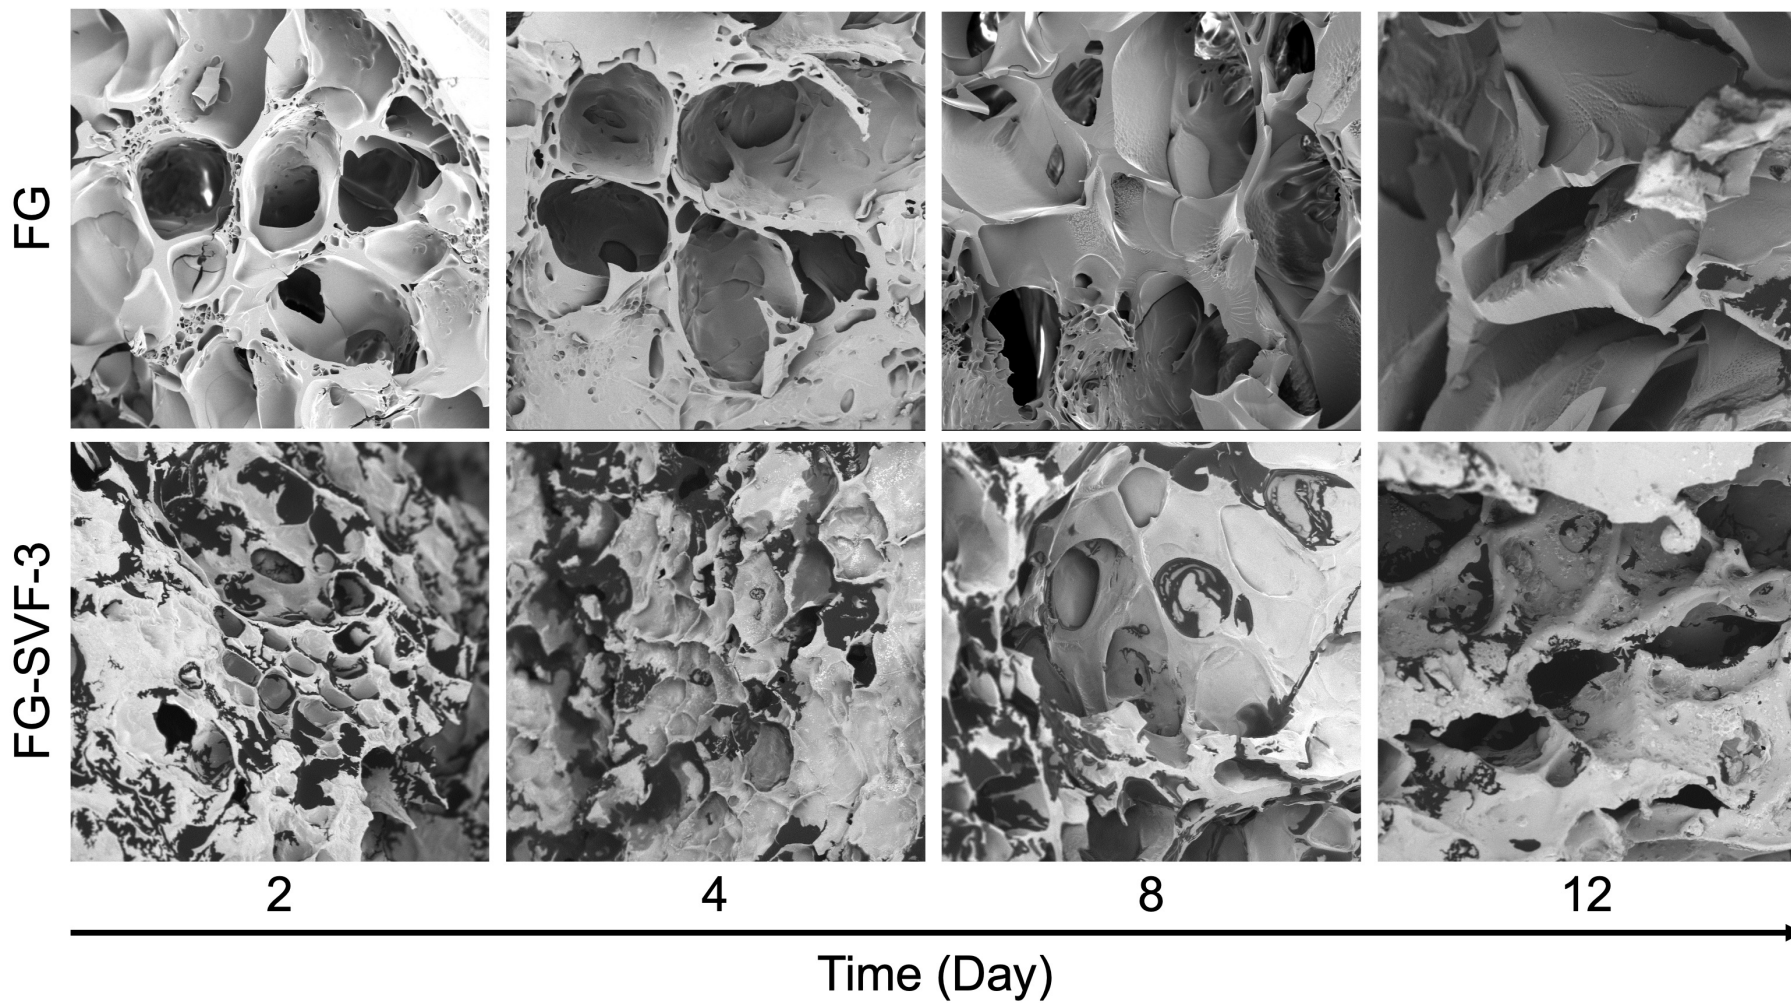

Supplement: d4na00332b5.pdf [file d4na00332b5.pdf]

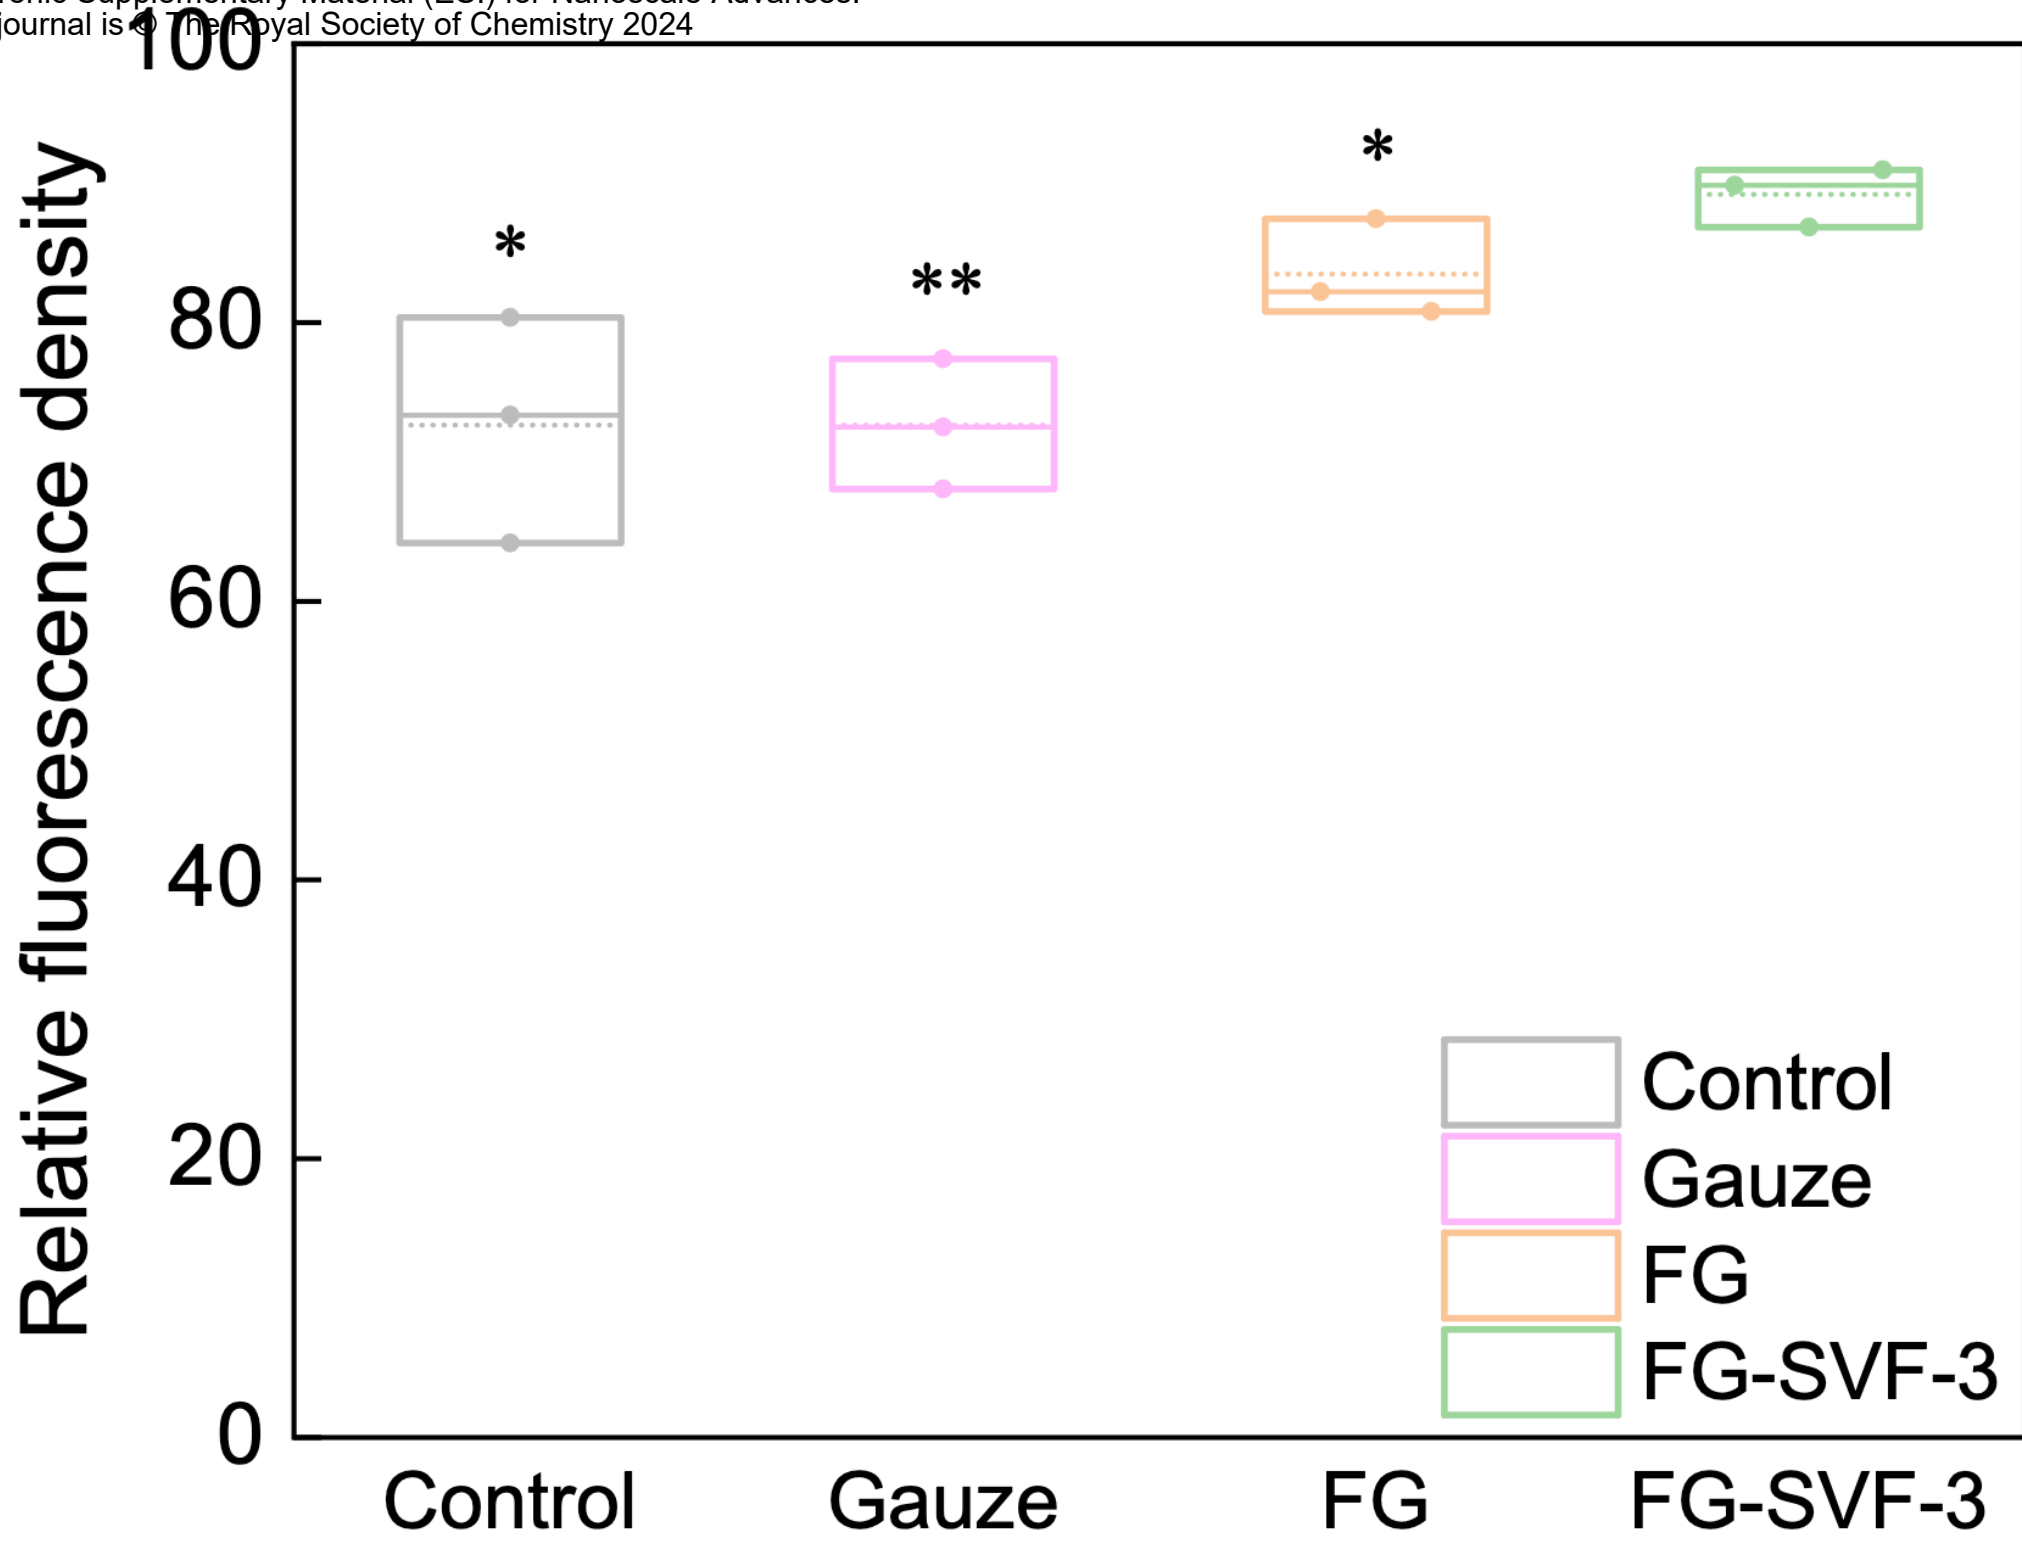

Supplement: d4na00332b6.pdf [file d4na00332b6.pdf]
